# Supplementary material
Source: MDPI journal article supplement (https://www.mdpi.com/2311-7524/10/5/494)
Supplement: s1 [file s1]

Type of the Paper (Article)

# Chitin Synthases in *Cordyceps militaris*: Genome-wide Gene Identification, Evolutionary Insights, and Life Cycle Transcript Profiling

Shoumian Li <sup>1,2,3†</sup>, Huihui Ren <sup>1†</sup>, Jie Zhang <sup>1</sup>, Shangpai Gao <sup>1</sup>, Zixuan Chen <sup>1</sup>, Guojie Li <sup>1,2,3</sup>, Jinghua Tian <sup>1,2,3</sup>, Junling Wang <sup>4</sup>, Ming Li <sup>1,2,3</sup>, Xiao Li <sup>1,2,3\*</sup>, Caihong Dong <sup>5\*</sup>

College of Horticulture, Hebei Agricultural University, Baoding, Hebei, China;  
yylsm@hebau.edu.cn (S.L.); 20237111186@pgs.hebau.edu.cn (H.R.);  
2021024010118@stu.hebau.edu.cn (J.Z.); 2021024010505@stu.hebau.edu.cn  
(S.G.); 2020024010215@stu.hebau.edu.cn (Z.X.); liguojie.imcas@foxmail (G.L.);  
yytjh@hebau.edu.cn (J.T.); yyliming@hebau.edu.cn (M.L.);  
lixiao@hebau.edu.cn (X.L.)

<sup>2</sup> Hebei Key Laboratory of Vegetable Germplasm Innovation and Utilization,  
Baoding, Hebei, China

<sup>3</sup> Collaborative Innovation Center of Vegetable Industry of Hebei Province,  
Baoding, Hebei, China

<sup>4</sup> College of Life Science, Hebei Agricultural University, Baoding 071001,  
China; wangjunling2001@163.com (J.W)

<sup>5</sup> State Key Laboratory of Mycology, Institute of Microbiology, Chinese  
Academy of Sciences, Beijing 100101, China; dongch@im.ac.cn (C.D.)

\* Correspondence: lixiao@hebau.edu.cn (X.L.); dongch@im.ac.cn (C.D.)

† These authors contributed equally to this work

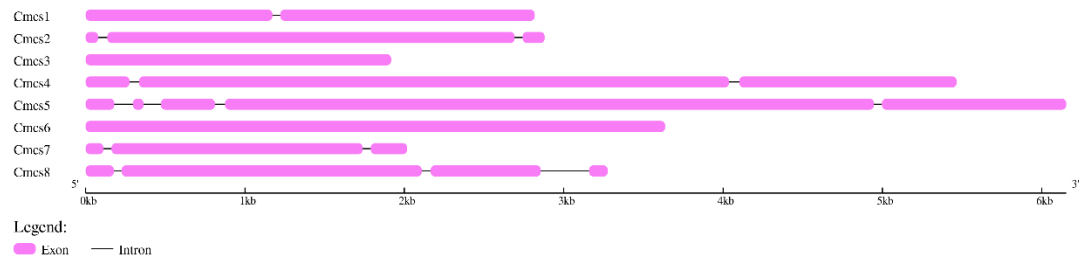

**Figure S1.** Gene structure of chitin synthase genes in *Cordyceps militaris*.

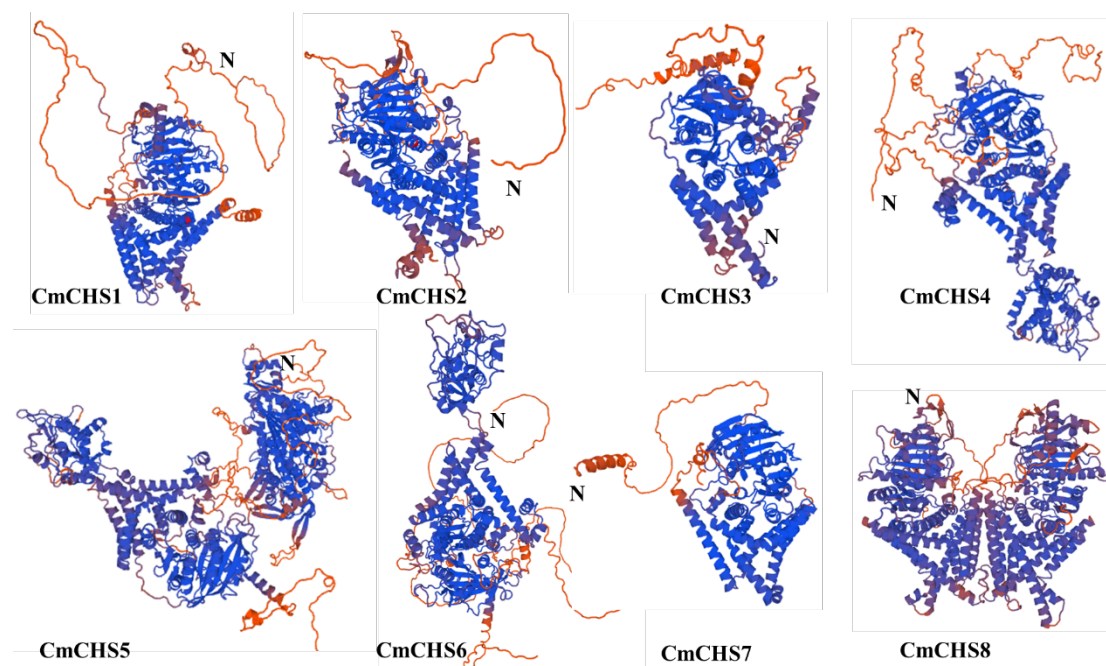

**Figure S2.** Homology modeling of eight CmCHS proteins.
